# Supplementary material for: A bone-targeting drug delivery vehicle of a metal–organic framework conjugate with zoledronate combined with photothermal therapy for tumor inhibition in cancer bone metastasis
Source: Royal Society of Chemistry journal article supplement (doi:10.1039/d1bm01717a), 2022-01-01
Supplement: d1bm01717a1.pdf [file d1bm01717a1.pdf]

## Supporting information

### A bone-targeting drugs delivery vehicle of metal–organic framework conjugate with zoledronate combining photothermal for tumor inhibition in a cancer bone metastasis

Ting Ge<sup>1,a</sup>, Zhang Weiwei<sup>1,a</sup>, Fei Ge<sup>a</sup>, Longbao Zhu<sup>a</sup>, Ping Song<sup>a</sup>, Wanzheng Li<sup>a</sup>, Lin Gui<sup>b</sup>, Wan Dong<sup>a</sup>, Yugui Tao<sup>a,\*</sup>, Kai Yang<sup>c,\*</sup>

<sup>a</sup> School of Biological and food Engineering, Anhui Polytechnic University, Wuhu, Anhui 241000, People's Republic of China

<sup>b</sup> Department of Microbiology and Immunology, Wannan Medical College, Wuhu, Anhui 241002, Peoples Republic of China

<sup>c</sup> State Key Laboratory of Radiation Medicine and Protection, School of Radiation Medicine and Protection & School for Radiological and Interdisciplinary Sciences (RAD-X), Collaborative Innovation Center of Radiation Medicine of Jiangsu Higher Education Institutions, Soochow University, Suzhou 215123, Jiangsu, China

<sup>1</sup> The authors contributed equally to this work

\* Corresponding authors. E-mail address: [swgctaoyg@126.com](mailto:swgctaoyg@126.com) and [kyang@suda.edu.cn](mailto:kyang@suda.edu.cn)

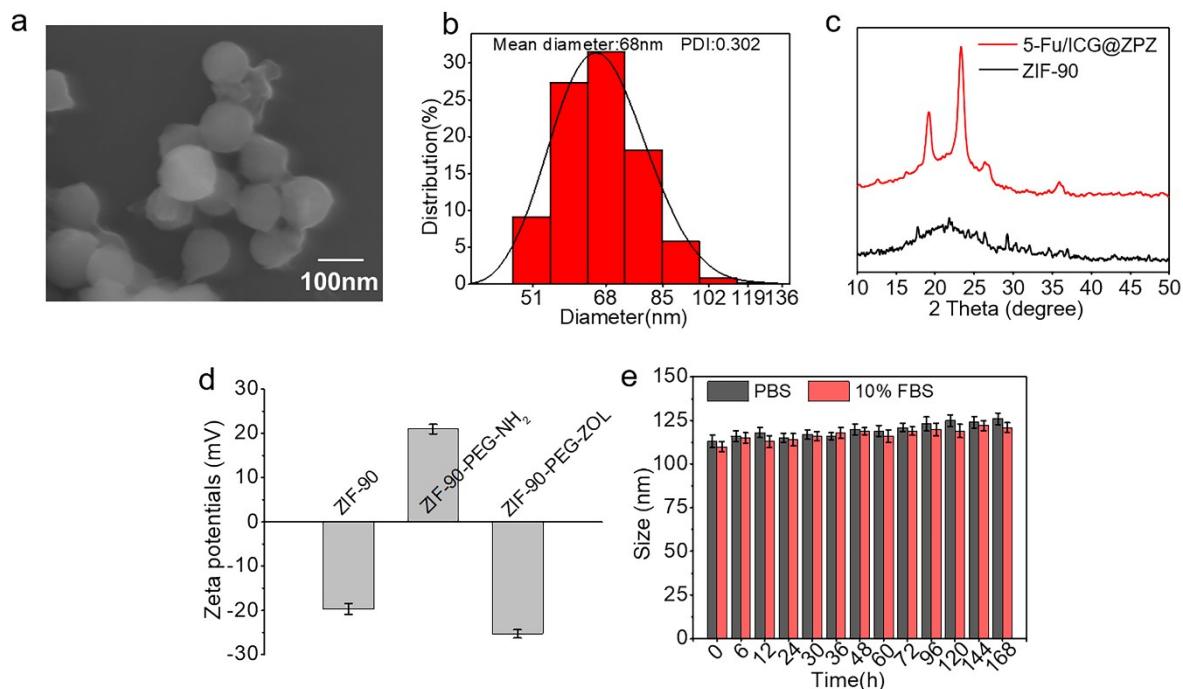

Figure S1. (a) SEM images and (b) DLS image of the particle size of ZIF-90. (c) XRD image of the particle size of ZIF-90 and 5-Fu/ICG@ZPZ (from 10°-50°). (d) Zeta potentials of ZIF-90, ZIF-90-PEG-NH<sub>2</sub>, ZIF-90-PEG-ZOL. (e) Stability of 5-Fu/ICG@ZPZ in PBS and FBS

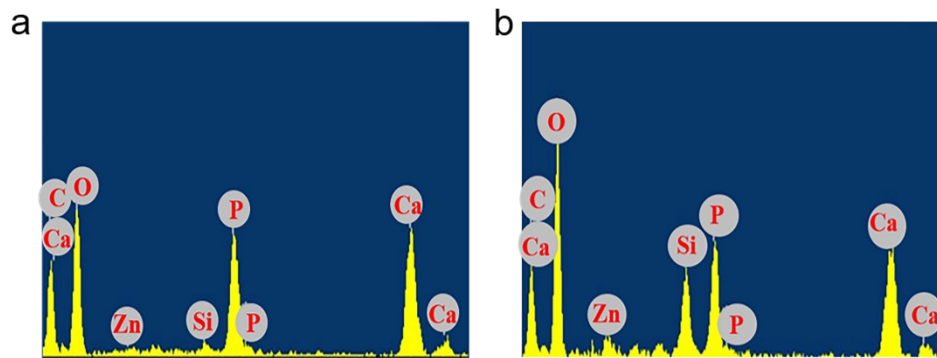

Figure S2. Bone was incubated with nanoparticle solution (0.1 mg/mL) for 12 hours under physiological conditions. Bone was washed with PBS and dried in vacuum overnight, and (a) EDS images of ZIF-90 and (b) ZIF-90@ICG-ZOL surface interactions with bone slices.

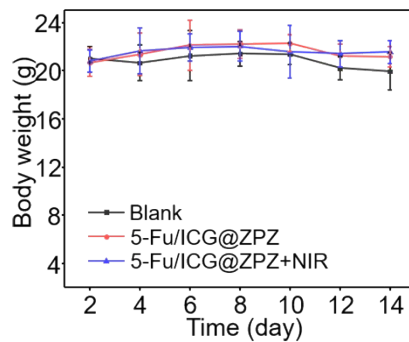

Figure S3. The body weight for different groups (blank, 5-Fu/ICG@ZPZ, 5-Fu/ICG@ZPZ +NIR) of mice with treatment on 14 days in parallel.
